# Supplementary material
Source: PubMed Central journal article supplement (PMC9035213)
Supplement: NIHMS1764946-supplement-1.pdf [file NIHMS1764946-supplement-1.pdf]

**Appendix**  
**Screening for Social Risk at Federally Qualified Health Centers: A National Study**  
**Cole et al.**

**Appendix Table 1.** Summary of Domains and Constructs Measured by Different Social Risk Screening Tools

| Variable                                  | PRAPARE | Recommend social<br>and behavioral<br>domains | AHC<br>screening<br>tools | WE<br>CARE | Upstream | WellRx | iHELP |
|-------------------------------------------|---------|-----------------------------------------------|---------------------------|------------|----------|--------|-------|
| Year created                              | 2016    | 2014                                          | 2017                      | 2007       | 2015     | 2014   | 2007  |
| Number of items                           | 36      | 23                                            | 26                        | 10         | 28       | 11     | 17    |
| <b>Domains</b>                            |         |                                               |                           |            |          |        |       |
| Economic stability                        | X       | X                                             | X                         | X          | X        | X      | X     |
| Education                                 | X       |                                               |                           | X          | X        | X      | X     |
| Food                                      | X       |                                               |                           | X          | X        | X      | X     |
| Health and clinical care                  | X       |                                               |                           |            |          |        |       |
| Neighborhood and physical environment     | X       | X                                             |                           | X          | X        | X      | X     |
| Social and community context              | X       | X                                             | X                         |            | X        |        | X     |
| <b>Constructs</b>                         |         |                                               |                           |            |          |        |       |
| Access to health care                     | X       |                                               |                           |            |          |        |       |
| Community engagement                      |         |                                               |                           |            | X        |        |       |
| Early childhood education and development | X       |                                               |                           |            | X        |        | X     |
| Employment                                | X       |                                               | X                         | X          | X        | X      | X     |
| Expenses                                  | X       | X                                             | X                         |            | X        | X      | X     |
| High school graduation                    |         |                                               |                           | X          | X        |        |       |
| Higher education                          |         |                                               |                           |            | X        |        |       |
| Hunger/Food (insecurity)                  | X       |                                               | X                         |            | X        | X      | X     |
| Incarceration                             | X       |                                               |                           |            |          |        |       |
| Immigration/Refugee status                | X       |                                               |                           |            | X        |        | X     |
| Income                                    | X       |                                               |                           |            | X        |        |       |
| Language                                  |         |                                               |                           |            |          |        | X     |
| Medical bills                             |         |                                               |                           | X          | X        | X      |       |
| Quality of housing                        | X       |                                               | X                         | X          | X        | X      | X     |
| Safety, crime, and violence               | X       | X                                             |                           | X          | X        | X      |       |
| Social support systems                    | X       | X                                             | X                         |            | X        |        |       |
| Transportation                            | X       |                                               | X                         | X          | X        | X      |       |

*Notes:* Authors' analysis of Kaiser Permanente Systematic Review of Social Risk Screening Tools. <https://sdh-tools-review.kpwashingtongresearch.org/>.

**Appendix**  
**Screening for Social Risk at Federally Qualified Health Centers: A National Study**  
**Cole et al.**

**Appendix Table 2.** List of States by Medicaid Expansion Status (2019)

| <b>Expansion states</b> | <b>Non-expansion states</b> |
|-------------------------|-----------------------------|
| Alaska                  | Alabama                     |
| Arkansas                | Florida                     |
| Arizona                 | Georgia                     |
| California              | Idaho                       |
| Colorado                | Kansas                      |
| Connecticut             | Missouri                    |
| Washington DC           | Mississippi                 |
| Delaware                | North Carolina              |
| Hawaii                  | Nebraska                    |
| Iowa                    | Oklahoma                    |
| Illinois                | South Carolina              |
| Indiana                 | South Dakota                |
| Kentucky                | Tennessee                   |
| Louisiana               | Texas                       |
| Massachusetts           | Utah                        |
| Maryland                | Wisconsin                   |
| Maine                   | Wyoming                     |
| Michigan                |                             |
| Minnesota               |                             |
| Montana                 |                             |
| North Dakota            |                             |
| New Hampshire           |                             |
| New Jersey              |                             |
| New Mexico              |                             |
| Nevada                  |                             |
| New York                |                             |
| Ohio                    |                             |
| Oregon                  |                             |
| Pennsylvania            |                             |
| Rhode Island            |                             |

**Appendix**  
**Screening for Social Risk at Federally Qualified Health Centers: A National Study**  
**Cole et al.**

|               |  |
|---------------|--|
| Virginia      |  |
| Vermont       |  |
| Washington    |  |
| West Virginia |  |

*Notes:* Expansion status as of 2019 – the year of our study period. All territories are classified as non-expansion states in main analyses.

*Source:* Kaiser Family Foundation. Status of State Action on the Medicaid Expansion Decision. <https://www.kff.org/medicaid/issue-brief/status-of-state-medicaid-expansion-decisions-interactive-map/>.

**Appendix**  
**Screening for Social Risk at Federally Qualified Health Centers: A National Study**  
**Cole et al.**

**Appendix Table 3.** List of States With Active Statewide Medicaid Accountable Care Organizations (2019)

| <b>ACO</b>    | <b>Non-ACO</b> |
|---------------|----------------|
| Colorado      | Alaska         |
| Connecticut   | Alabama        |
| Iowa          | Arkansas       |
| Massachusetts | Arizona        |
| Maine         | California     |
| Minnesota     | Washington DC  |
| New Jersey    | Delaware       |
| New York      | Florida        |
| Oregon        | Georgia        |
| Rhode Island  | Hawaii         |
| Utah          | Idaho          |
| Vermont       | Illinois       |
|               | Indiana        |
|               | Kansas         |
|               | Kentucky       |
|               | Louisiana      |
|               | Maryland       |
|               | Michigan       |
|               | Missouri       |
|               | Mississippi    |
|               | Montana        |
|               | North Carolina |
|               | North Dakota   |
|               | Nebraska       |
|               | New Hampshire  |
|               | New Mexico     |
|               | Nevada         |
|               | Ohio           |
|               | Oklahoma       |
|               | Pennsylvania   |

**Appendix**  
**Screening for Social Risk at Federally Qualified Health Centers: A National Study**  
**Cole et al.**

|  |                |
|--|----------------|
|  | South Carolina |
|  | South Dakota   |
|  | Tennessee      |
|  | Texas          |
|  | Virginia       |
|  | Washington     |
|  | Wisconsin      |
|  | West Virginia  |
|  | Wyoming        |

*Notes:* All territories are classified as non-ACO states in main analyses.

*Source:* Authors' analysis based on state websites, the National Association of ACOs, and the Center for Health Care Strategies.

**Appendix**  
**Screening for Social Risk at Federally Qualified Health Centers: A National Study**  
**Cole et al.**

**Appendix Table 4.** Adjusted Association Between Key FQHC Characteristics and Probability of Having Social Risk Screening Capabilities, Excluding U.S. Territories<sup>a</sup>

| Variable                                 | Difference in probability of social risk screening capabilities <sup>b</sup> (95% CI) | <i>p</i> -value  |
|------------------------------------------|---------------------------------------------------------------------------------------|------------------|
| Percent patients who are uninsured       |                                                                                       |                  |
| q1: 0–<11.5%                             | ref                                                                                   | ref              |
| q2: 11.5–<20.6%                          | <b>8.00 (0.23, 15.77)</b>                                                             | <b>0.044</b>     |
| q3: 20.6–<32.8%                          | 4.74 (–2.83, 12.30)                                                                   | 0.214            |
| q4: ≥32.8%                               | 4.68 (–2.77, 12.13)                                                                   | 0.213            |
| Urban service area (ref=rural)           | 4.49 (–1.77, 10.74)                                                                   | 0.156            |
| FQHC size                                |                                                                                       |                  |
| q1: >25,892 unique patients              | ref                                                                                   | ref              |
| q2: 13,146 to 25,862 pts                 | –2.70 (–10.35, 4.95)                                                                  | 0.481            |
| q3: 6,530 to 13,146 pts                  | <b>–8.36 (–14.60, –2.12)</b>                                                          | <b>0.010</b>     |
| q4: <6,530 pts                           | <b>–13.39 (–20.06, –6.71)</b>                                                         | <b>&lt;0.001</b> |
| Total revenue (\$)/1,000 patients served | –2.06 (–4.67, 0.56)                                                                   | 0.121            |
| FQHC has Medicaid managed care contract  | <b>–10.13 (–15.00, –5.26)</b>                                                         | <b>&lt;0.001</b> |
| Medicaid expansion state as of 2019      | 4.91 (–3.20, 13.02)                                                                   | 0.229            |
| Active Medicaid ACO in state             | <b>15.24 (9.01, 21.48)</b>                                                            | <b>&lt;0.001</b> |

<sup>a</sup>N=1,352 federally qualified health centers (FQHCs), representing 29.3 million FQHC patients across all 50 U.S. states and the District of Columbia, based on data from the 2019 Uniform Data System (UDS).

<sup>b</sup>All coefficients are based on results from a linear probability regression model that adjusts for percent of patients who are uninsured, FQHC size (number of patients), urban vs rural service area, total revenue per unique patient served, location in a Medicaid expansion state, location in a state with an active Medicaid accountable care organization (ACO), and participation in at least 1 Medicaid managed care contract, with robust SEs clustered at the state-level. Boldface indicates statistical significance (*p*<0.05).
